# Supplementary material for: Sir2 Paralogues Cooperate to Regulate Virulence Genes and Antigenic Variation in Plasmodium falciparum
Source: PubMed Central journal article supplement (PMC2672602; doi:10.1371/journal.pbio.1000084), 2009-04-14

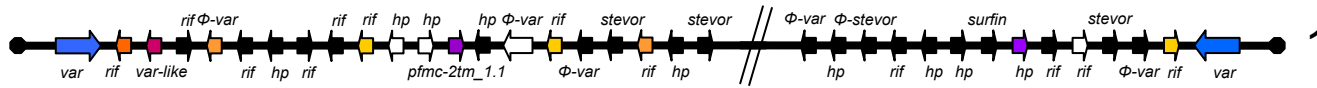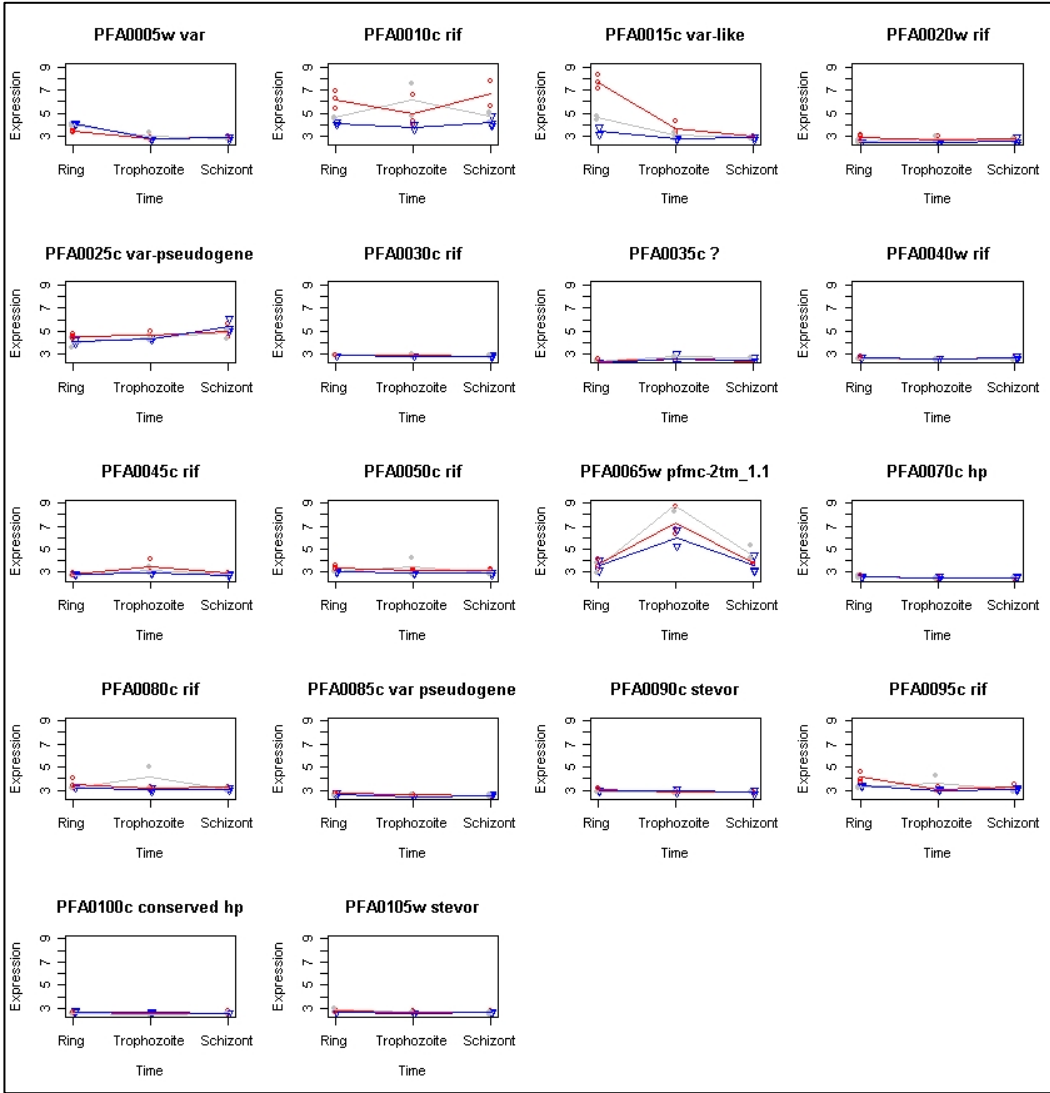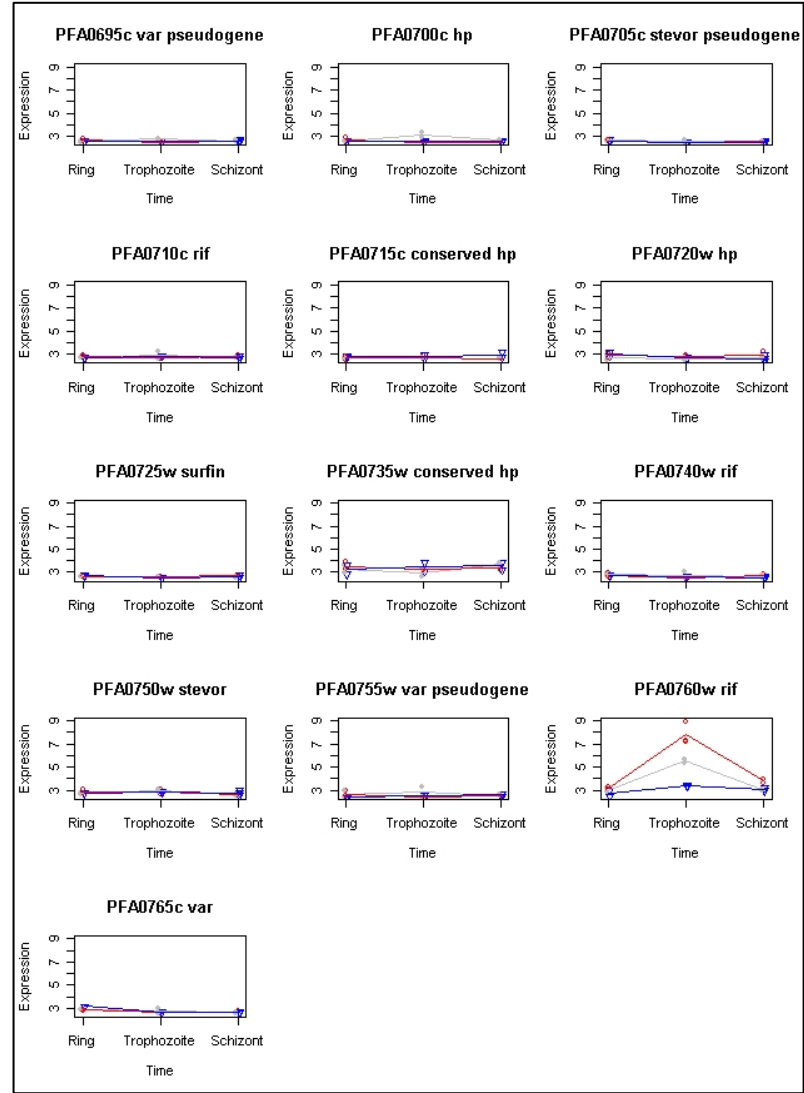

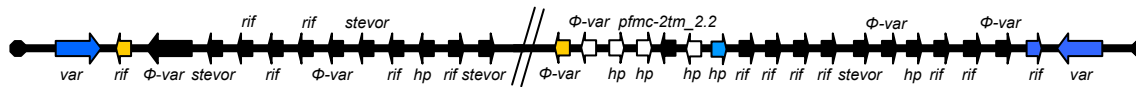

2

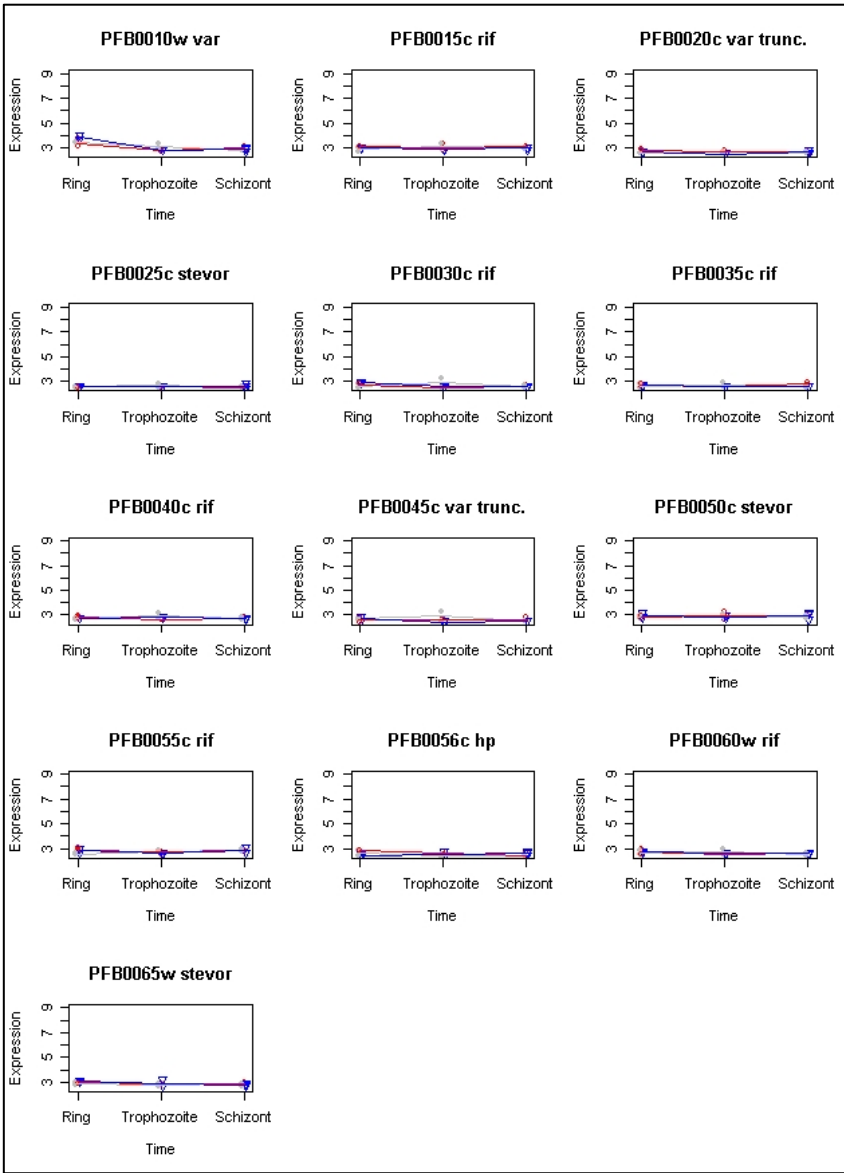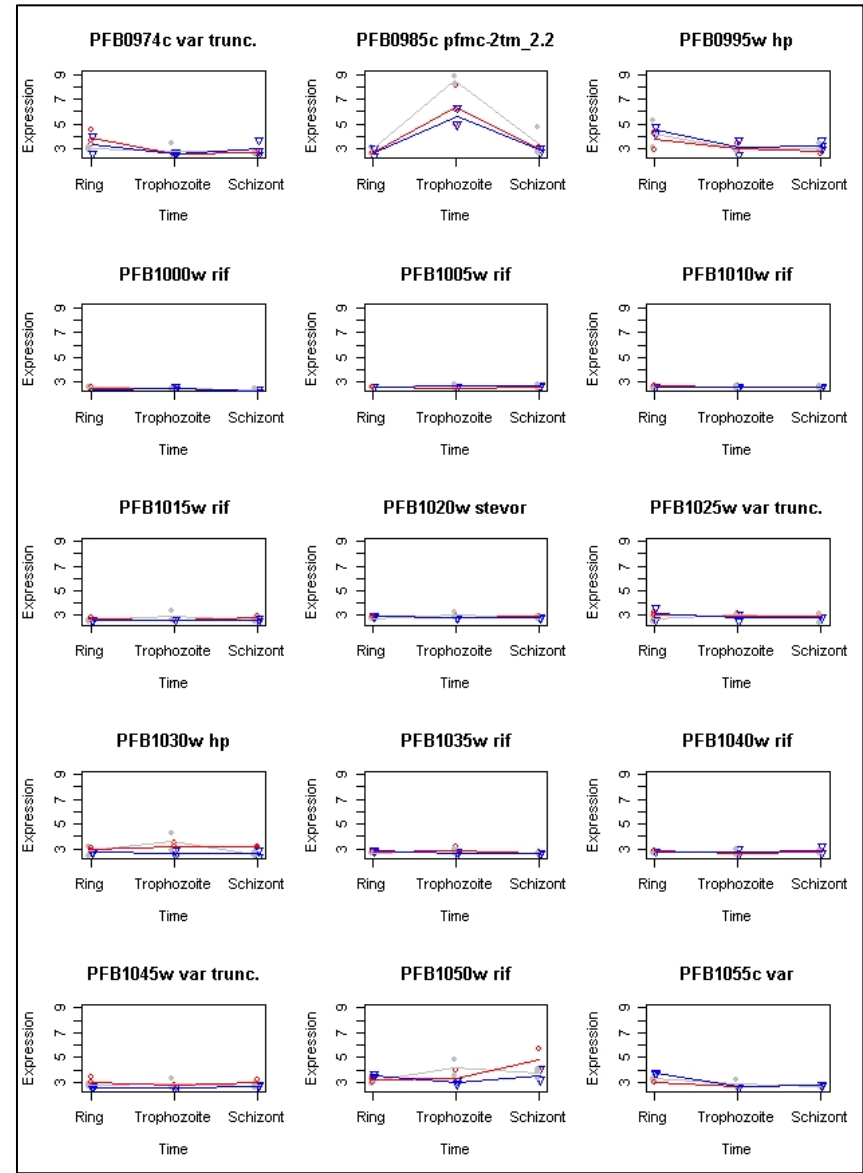

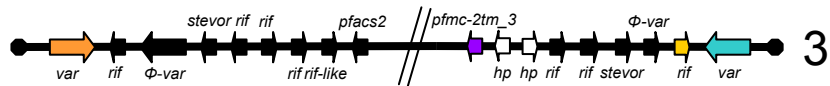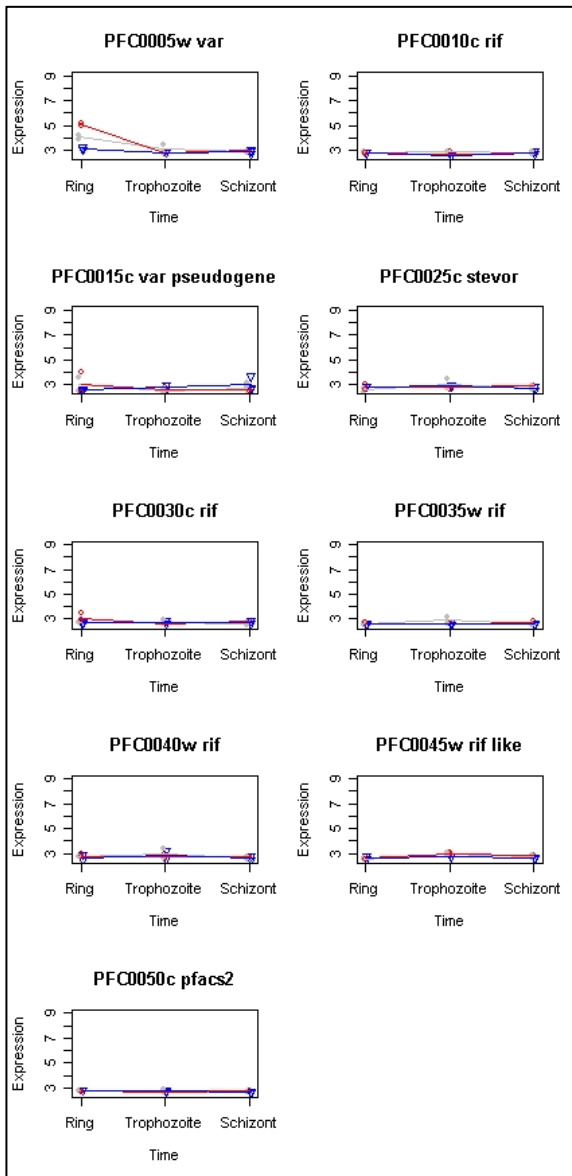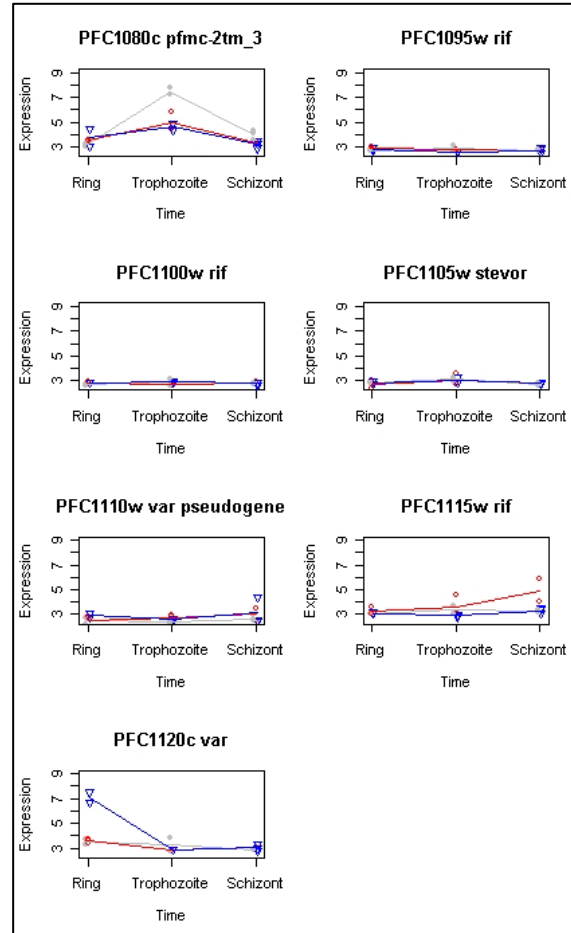

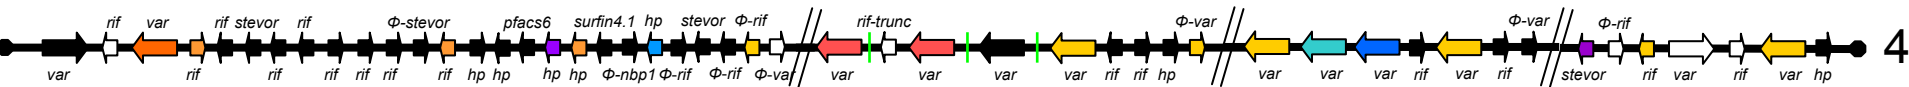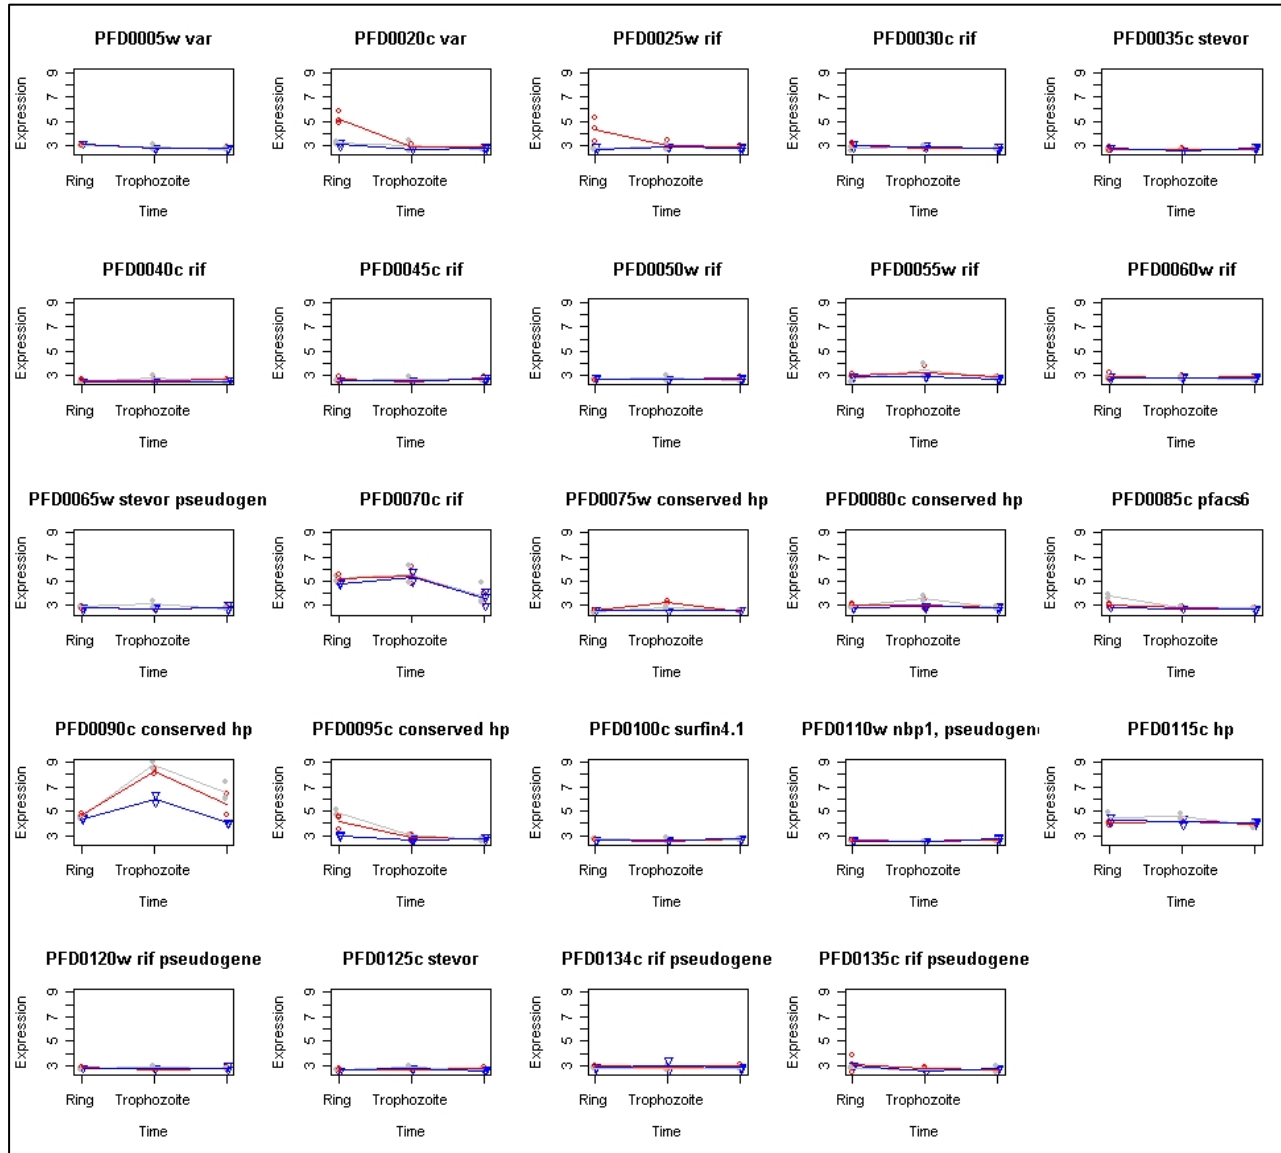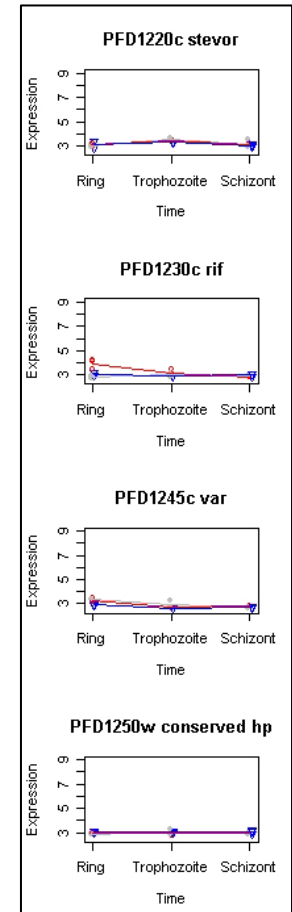

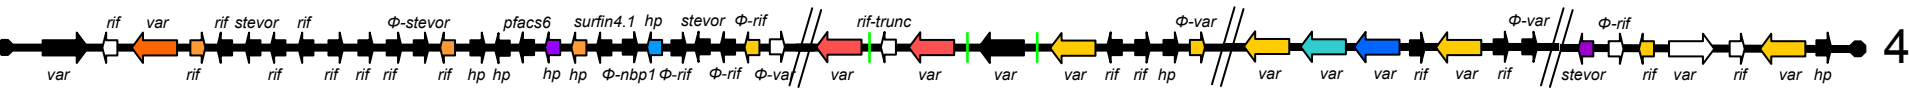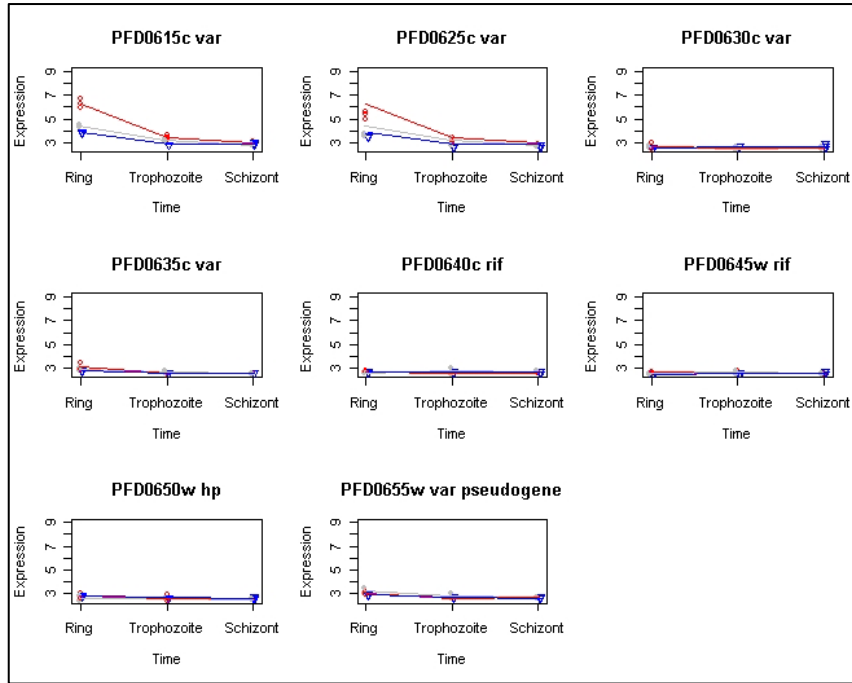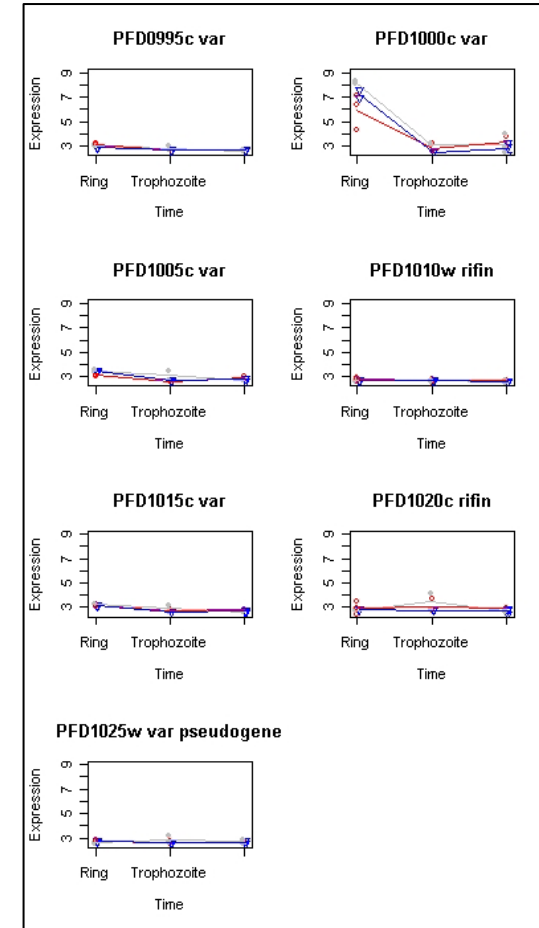

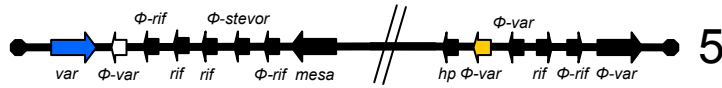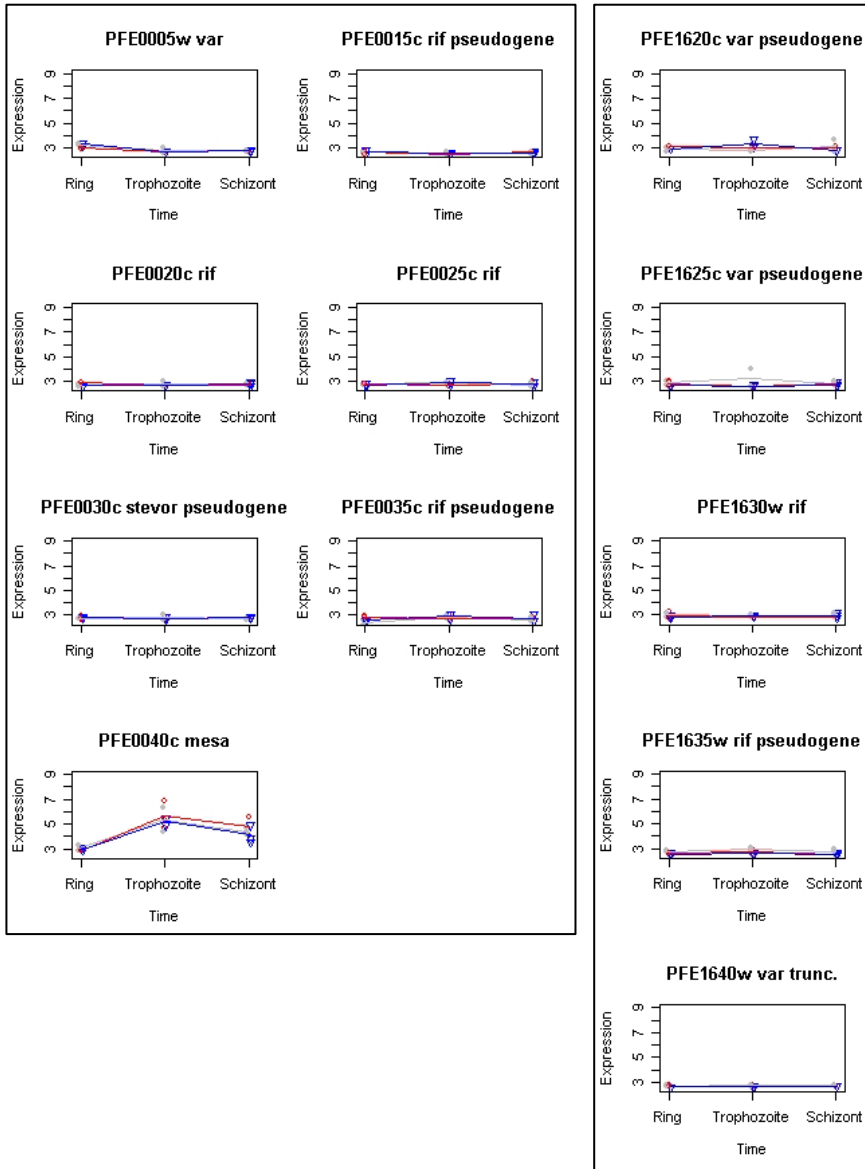

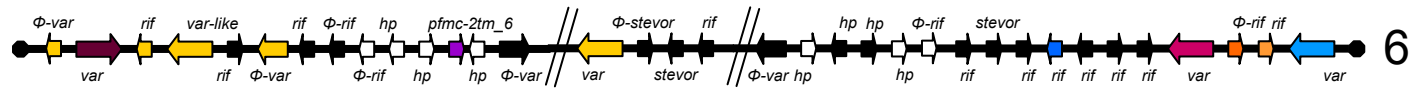

6

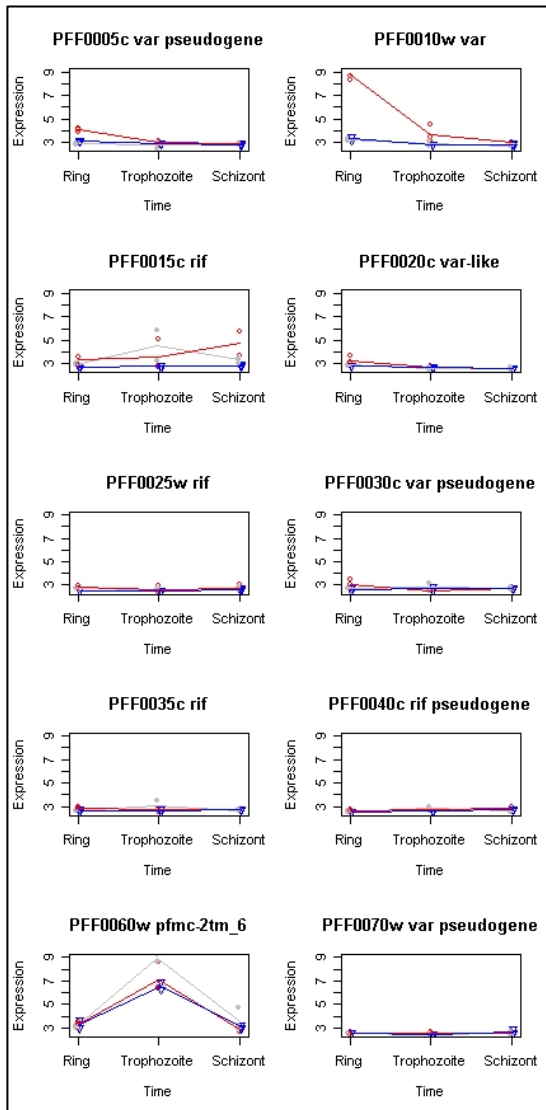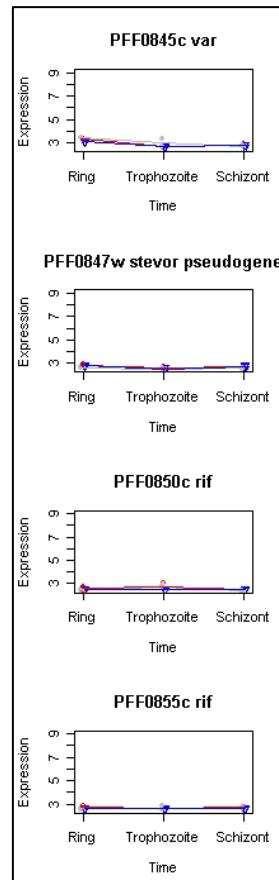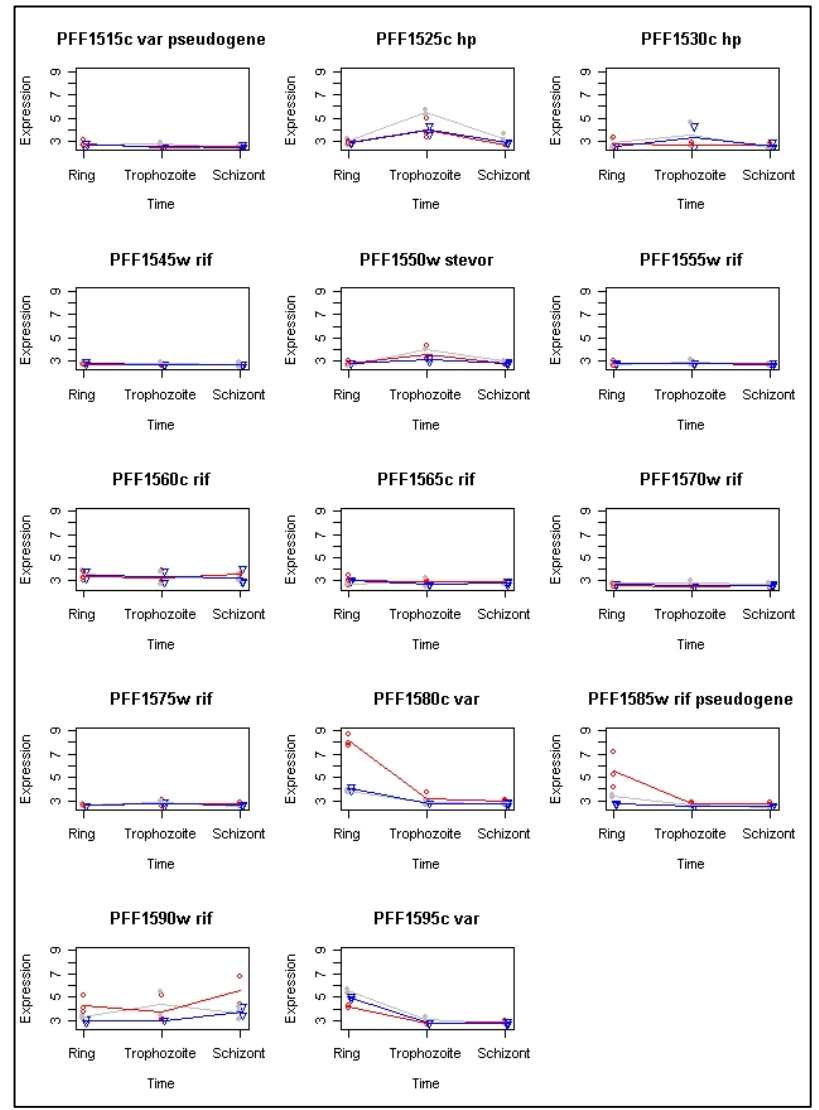

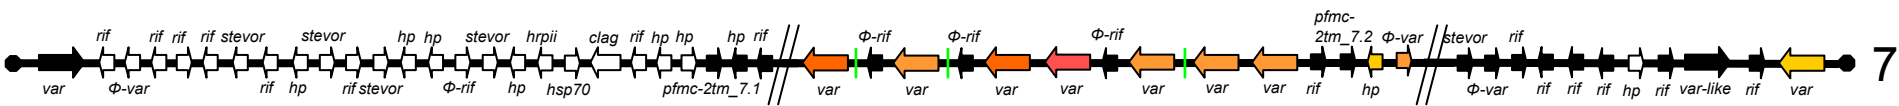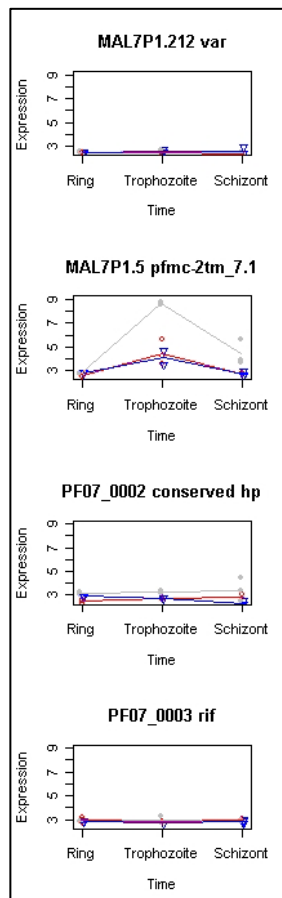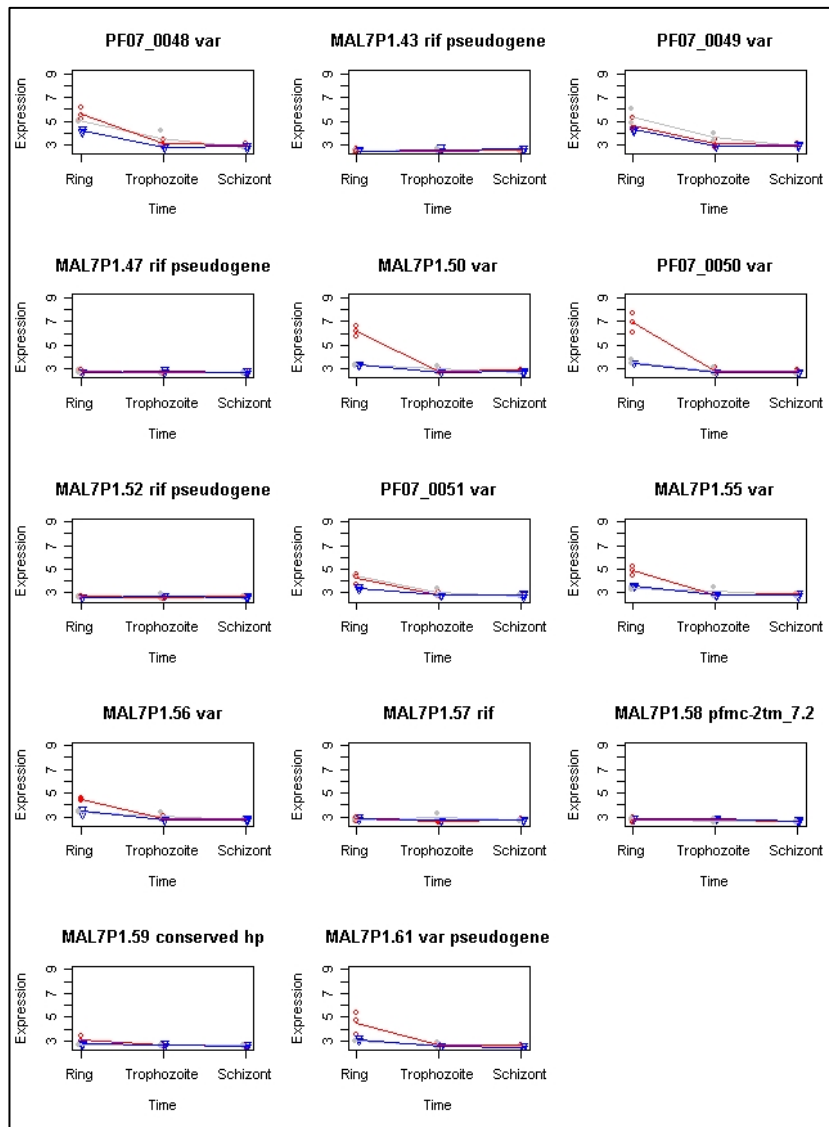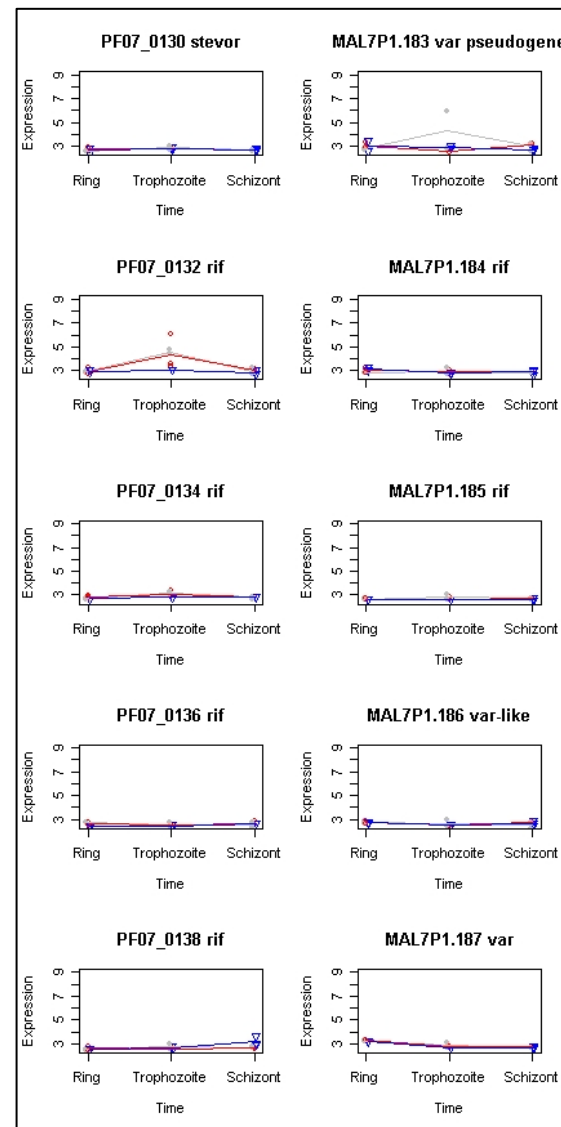



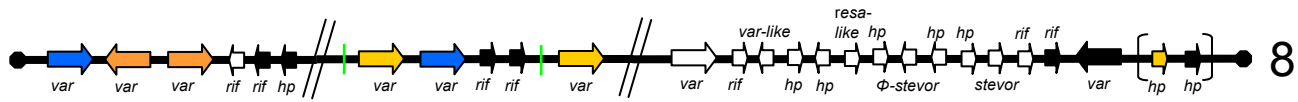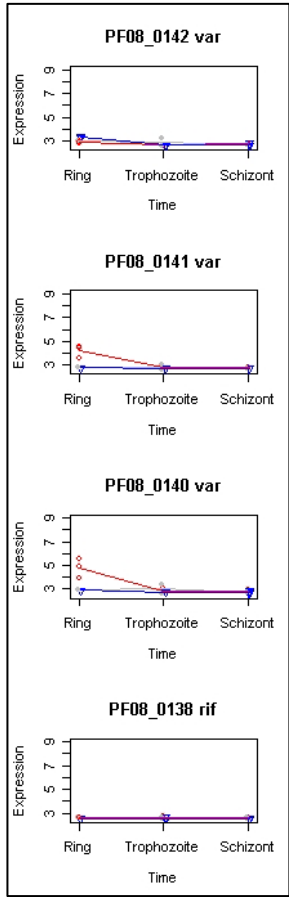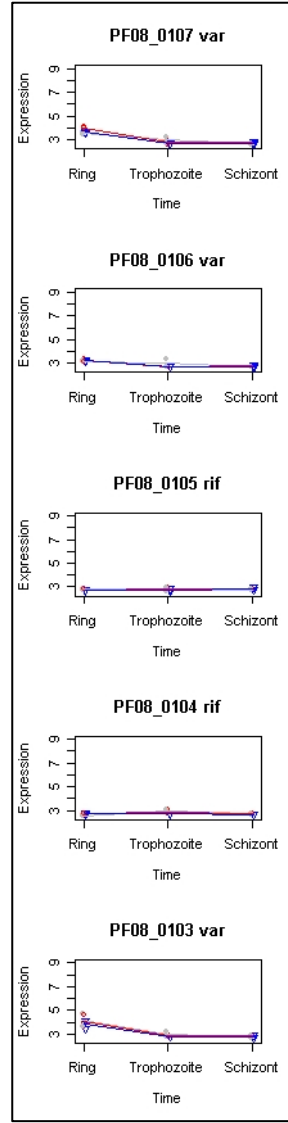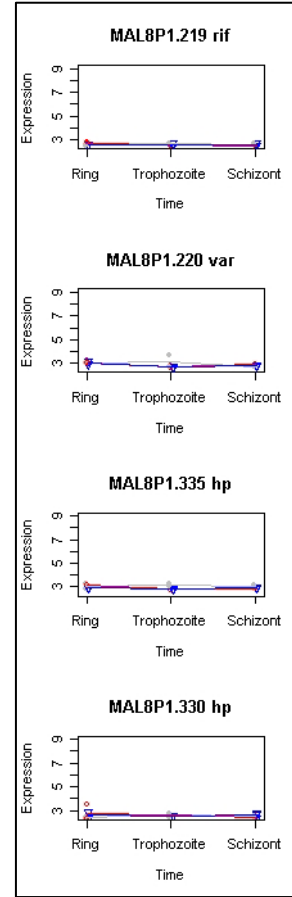

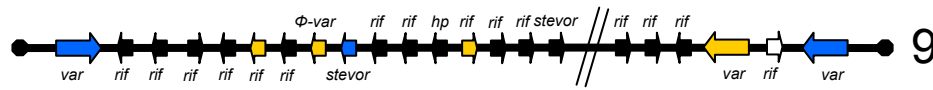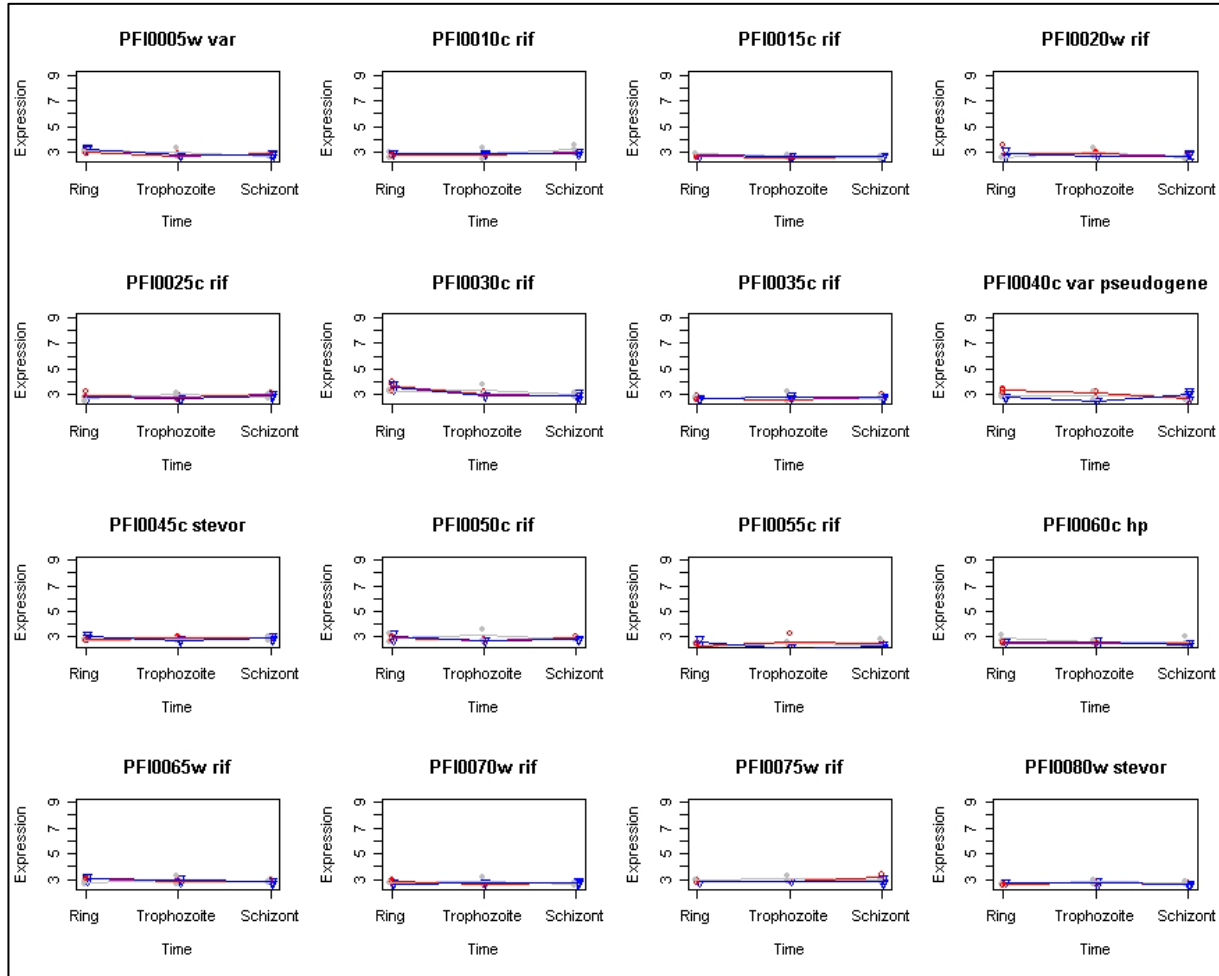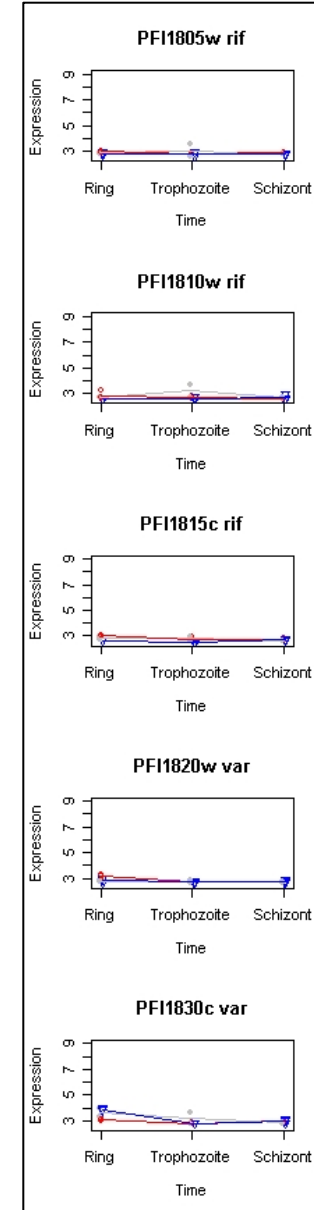

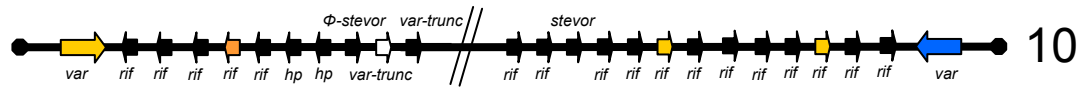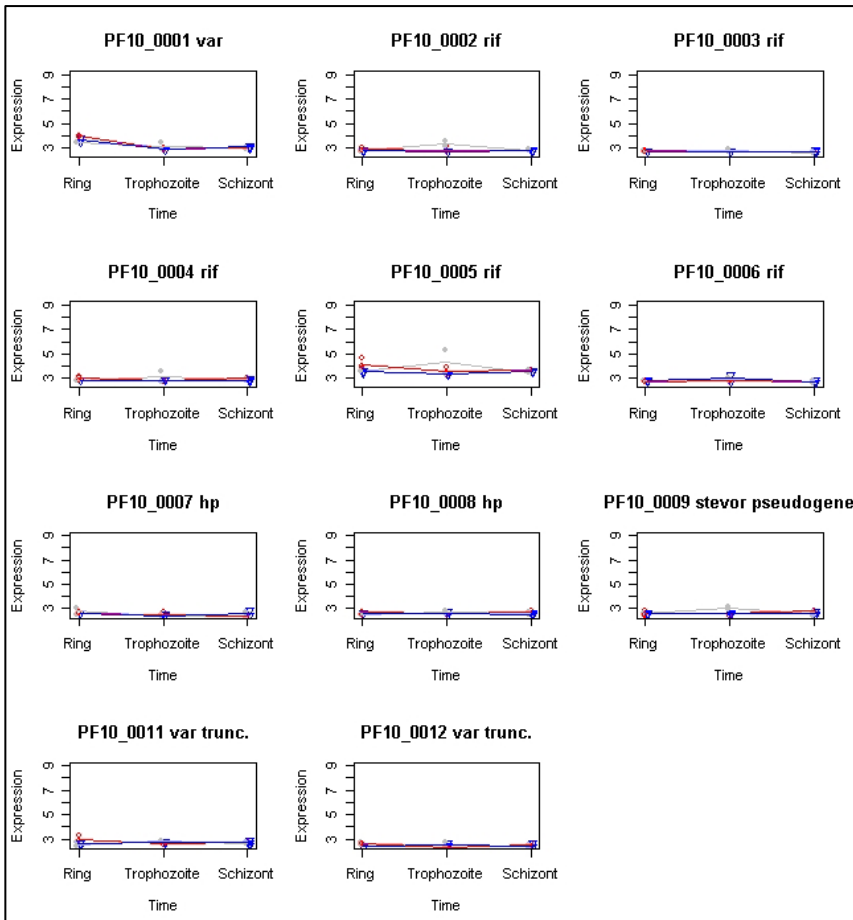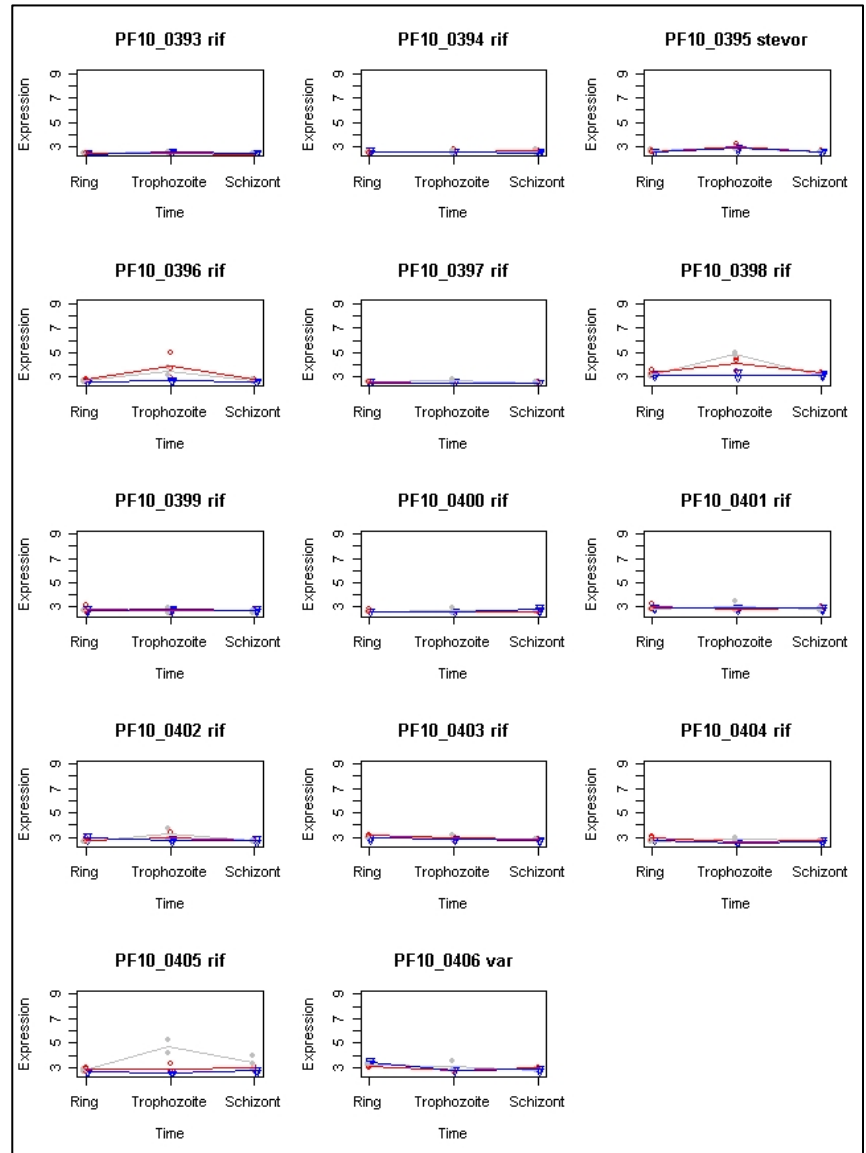

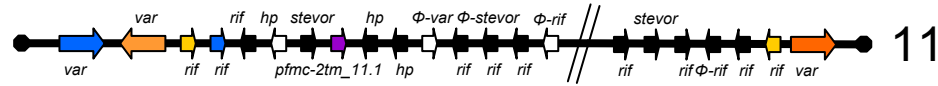

11

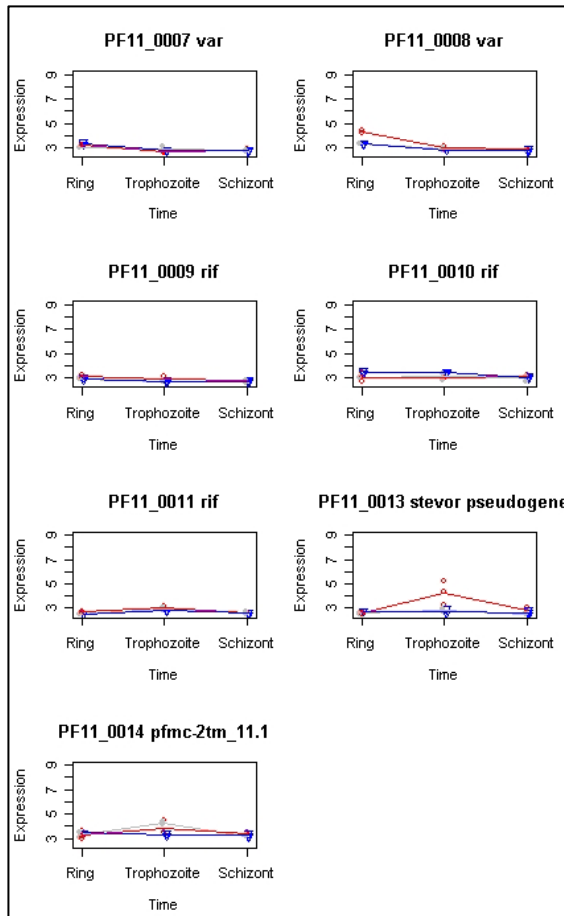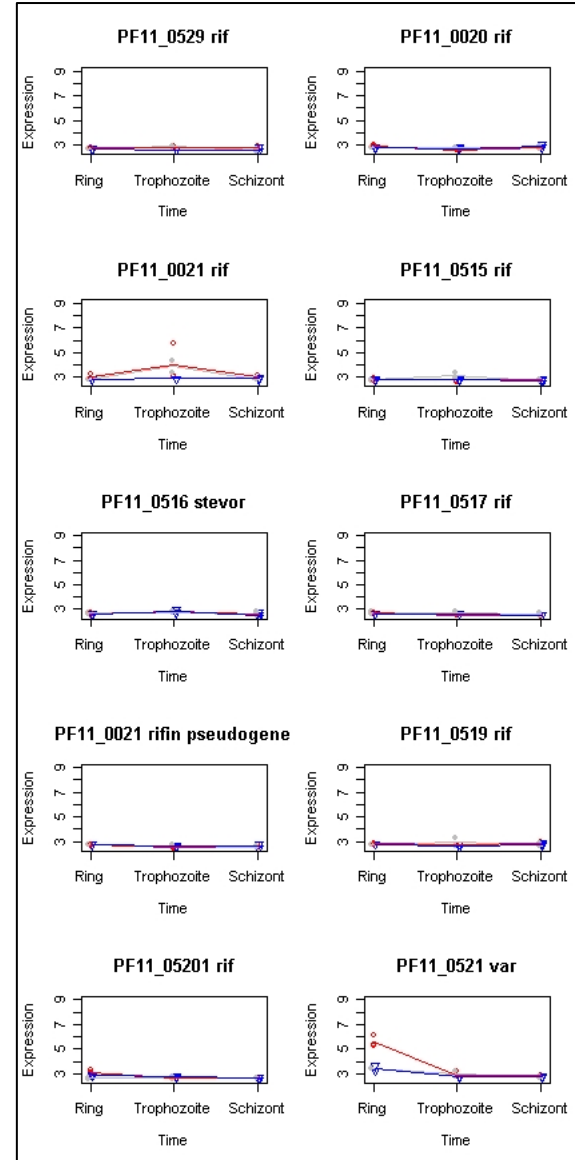

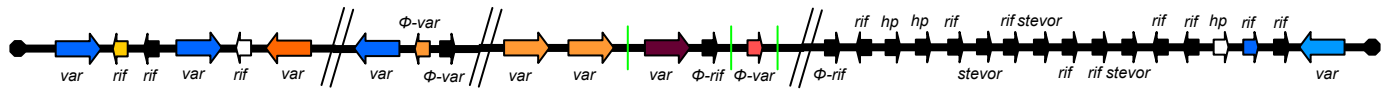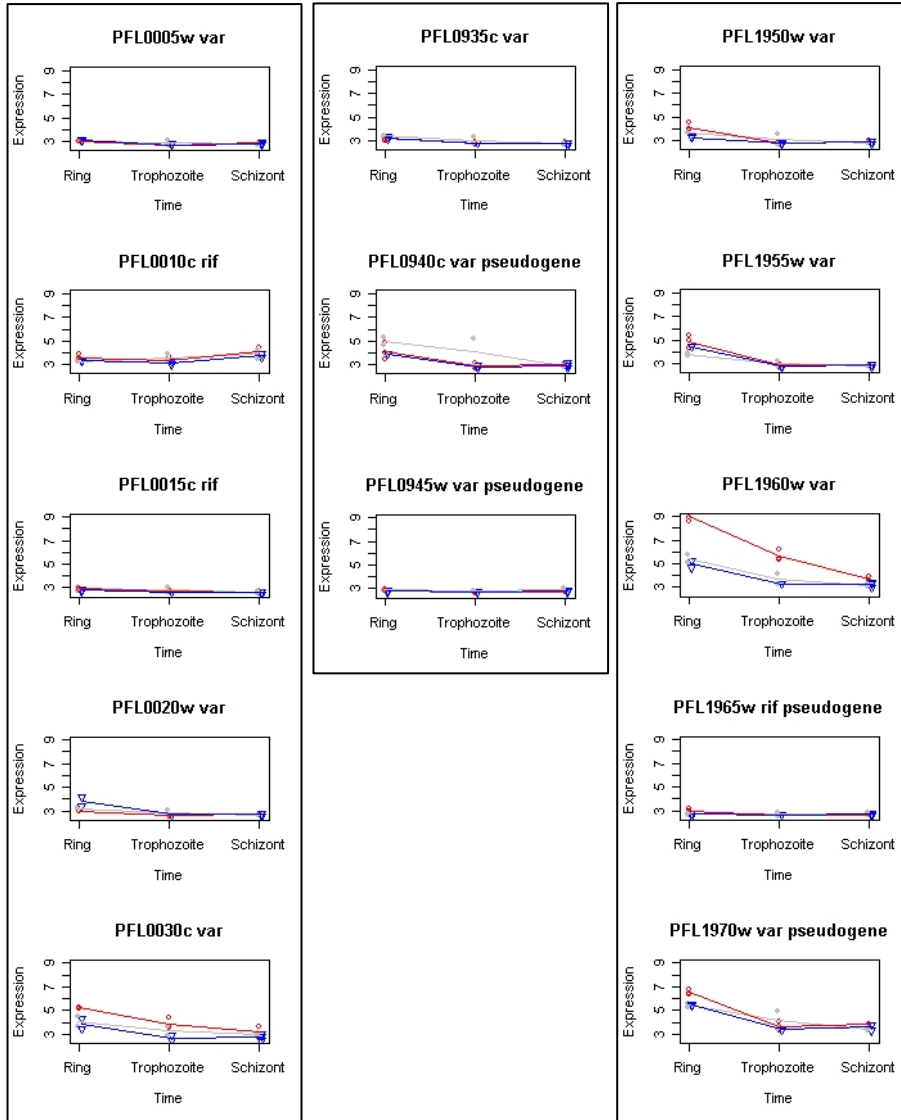

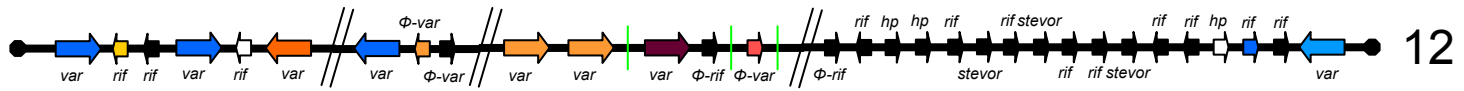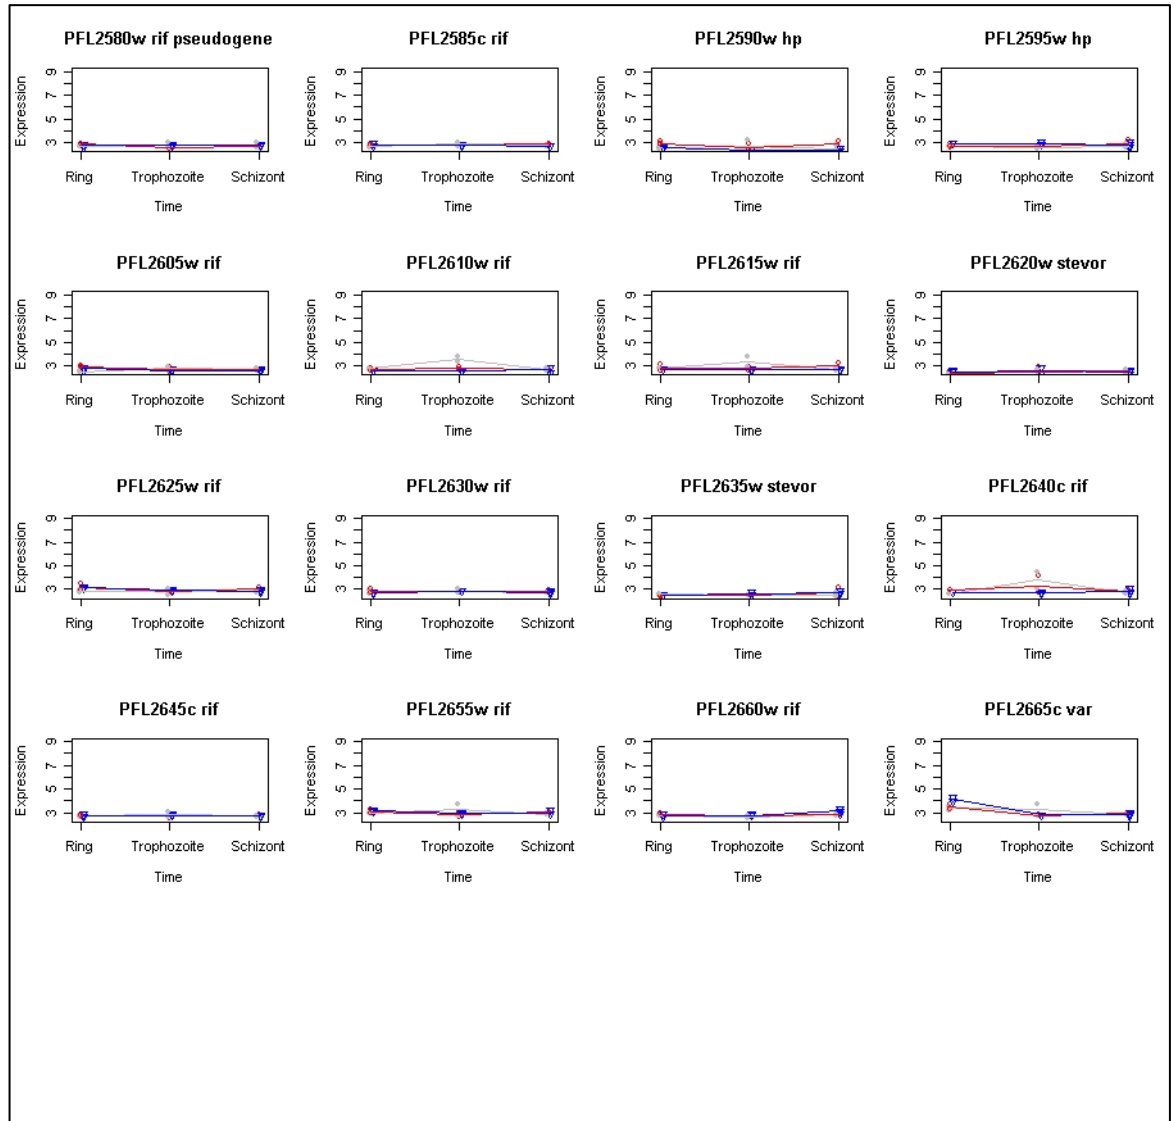

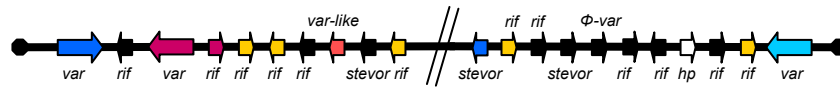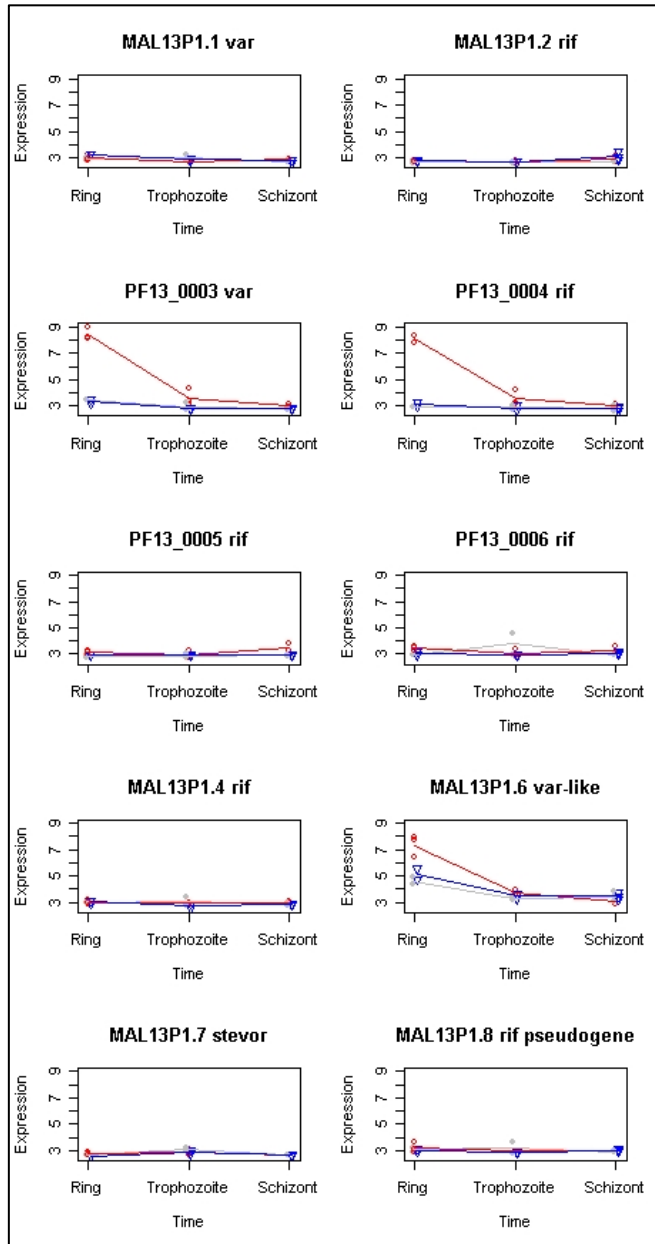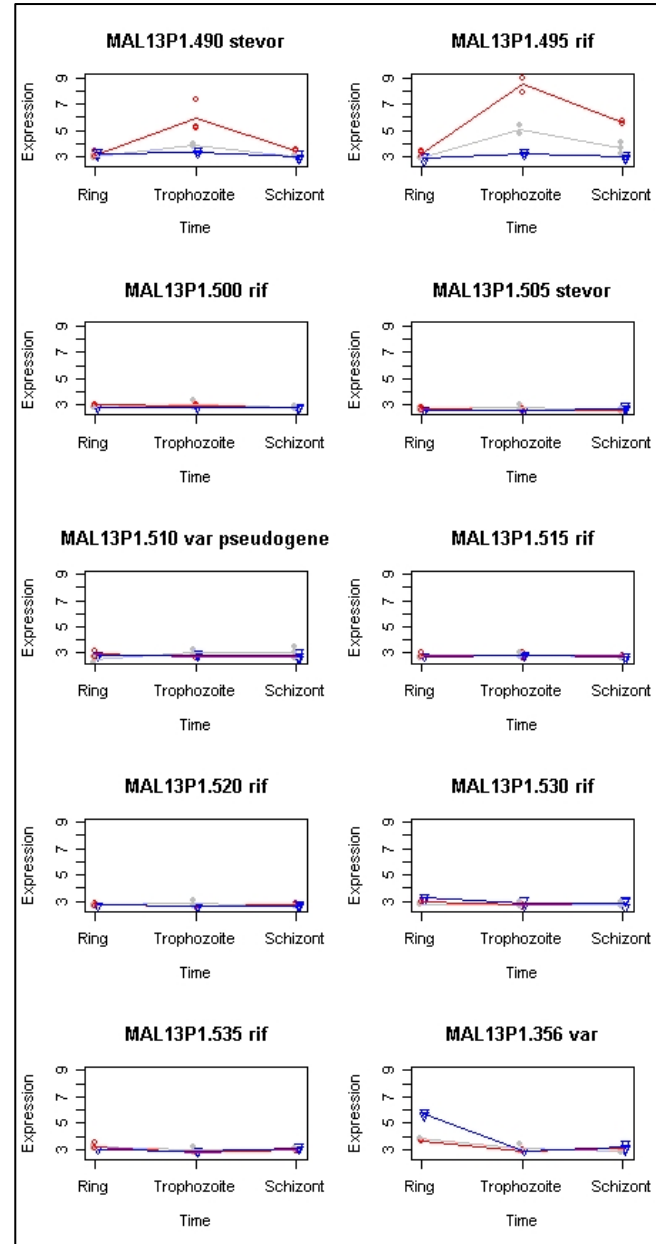

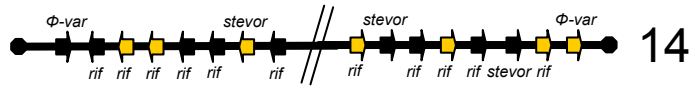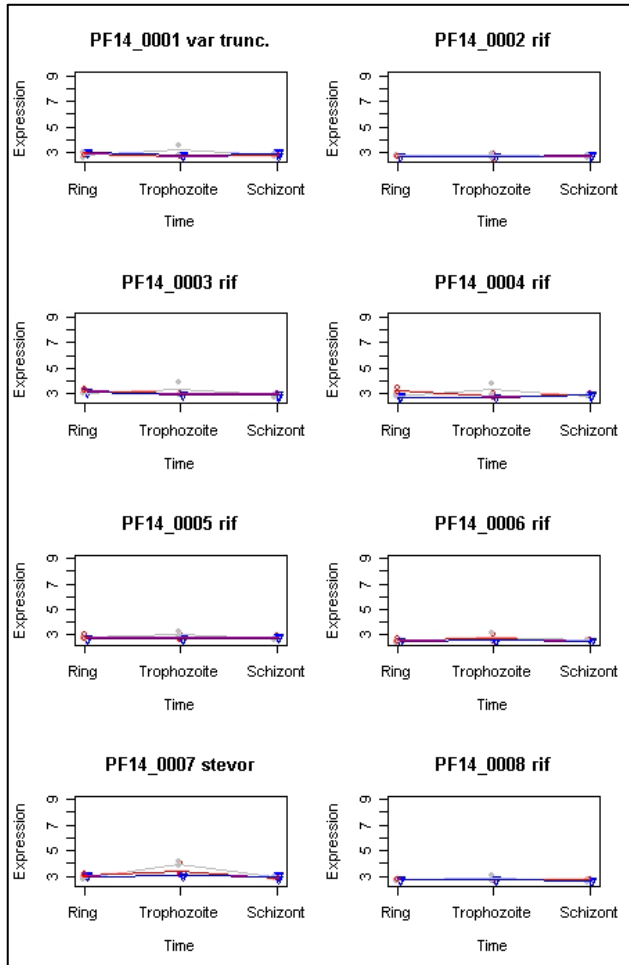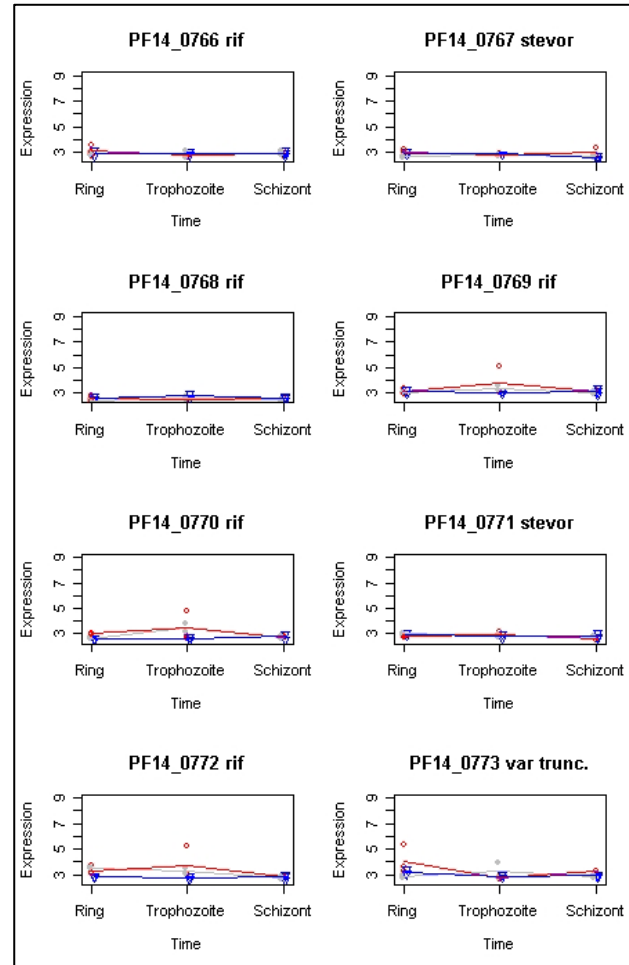

Supplement: pbio.1000084.sg003.pdf [file pbio.1000084.sg003.pdf]
