# Supplementary material for: Sir2 Paralogues Cooperate to Regulate Virulence Genes and Antigenic Variation in Plasmodium falciparum
Source: PLoS Biol. 2009 Apr 14;7(4):e1000084. doi: 10.1371/journal.pbio.1000084 (PMC2672602; doi:10.1371/journal.pbio.1000084)
Supplement: Table S2 [file pbio.1000084.st002.xls]

## Sheet: Sheet1
Table S2. Expression of 3D7 var repertoire in Sir2A, Sir2B and wildtype parasites before and after selection on condroitin sulphate A
	Raw expression values normalised against PFL2215
			3D7	3D7_CSA	SIR2A	SIR2A_CSA	SIR2B	SIR2B_CSA
	UpsA	PF08_0141	0.115896	0.0319087	1.79871	0.164641	0.0450063	0.104787
		PF11_0008	0.638493	0.123719	1.86448	1.07639	0.916449	0.831145		`
		PF11_0521	1.01675	0.358677	4.38663	2.3669	1.5041	0.786958
		PF13_0003	1.4007	1.61588	83.8523	38.3391	0.711239	0.411364
		PFA0015c	1.4007	0.308975	26.1751	16.0735	2.57678	1.42452
		PFD0020c	1.62823	0.0613216	1.72637	0.444155	0.306649	0.16907
		PFD1235w	0.389992	0.0484118	2.68985	1.08362	0.548004	0.348239
		PFI1820w	1.13052	0.351147	4.48857	3.10185	1.56239	0.653343
	UpsB	PFE0005w	0.294716	0.0377181	0.0753027	0.0483218	1.35252	0.417677
		PFC1120c	0.558148	0.0576638	0.286413	0.215712	4.46565	0.809052
		MAL13P1.356	1.51802	0.148248	0.128902	0.0815972	10.004	2.10732
		MAL7P1.187	1.27983	0.103063	0.858253	0.470197	3.46292	1.5392
		PFF1595	1.44692	0.0830531	0.231498	0.183594	2.36458	0.777489
		MAL13P1.1	0.477803	0.0593851	0.0966768	0.0554109	1.59038	0.629146
		PF08_0142	1.16962	0.0785347	0.147975	0.093316	2.18269	0.430302
		PF10_0001	0.392125	0.0824076	0.195655	0.114728	0.778865	0.654396
		PF10_0406	0.727725	0.0847744	0.530407	0.177228	0.638949	0.372437
		PF11_0007	0.988313	0.126301	0.557043	0.37037	2.12206	1.33194
		PFA0005w	2.80496	0.155563	0.452145	0.380498	6.59937	1.29827
		PFA0765c	0.39888	0.00722949	0.0723432	0.041088	0.944432	0.159075
		PFB0010w	1.2585	0.0841289	0.22525	0.164207	4.24412	0.801687
		PFB1055c	1.86642	0.0815469	0.233142	0.125289	4.7175	0.650187
		PFD0005w	0.190552	0.033587	0.0841812	0.0448495	0.436071	0.392427
		PFD1245c	0.0817669	0.0169334	0.0365333	0.0181568	0.00606302	0
		PFI0005w	0.254188	0.0849896	0.031272	0.0142216	0.704243	0.514469
		PFI1830c	1.77043	1.04569	0.280494	0.154225	2.64208	7.23833
		PFL0005w	0.212238	0.025712	0.088456	0.0490451	0.914117	0.402948
		PFL0935c	0.114829	0.0416556	0.0868118	0.062066	0.400626	0.129091
		PFL2665c	0.917211	0.0793953	0.119366	0.0706019	2.3296	0.850083
	UpsBA	PFF1580c	3.0467	0.130389	42.9127	19.1696	2.86361	1.00895
		MAL6P1.316/PFF0010w	0.785673	0.106506	48.9961	18.5475	0.608634	0.321937
		PFL0020w	0.775008	0.0923051	0.125285	0.0577257	1.43181	0.432406
	UpsBC	MAL7P1.55	12.7272	0.479169	1.11474	0.833333	1.03071	0.477646
		PF07_0050	1.76332	0.067131	42.8469	15.0752	5.22353	0.439771
		PF08_0103	2.1686	0.419569	1.46331	1.34404	7.83529	0.755395
		PF08_0106	3.28134	0.086926	0.323571	0.219184	2.6071	0.679646
		PFD1005c	1.16962	0.0535757	0.133177	0.103299	1.39916	0.483958
		PFL1950w	0.350531	0.0733707	2.37088	1.31221	1.20094	0.389271
		PFL1955w	1.34738	0.123289	1.10488	0.713252	3.96895	0.682802
	UpsC	MAL6P1.252/PFF0845c	0.771453	0.453995	0.150605	0.0639468	0.797521	2.40927
		MAL7P1.56	0.416656	0.0583093	0.42814	0.22526	0.371477	0.118885
		PF07_0048	0.824779	0.128237	0.723432	0.402199	1.83756	0.501844
		PF07_0049	5.31129	0.17751	0.68726	0.41088	6.24958	0.61126
		PF07_0051	0.739457	0.090799	1.24628	0.818866	2.18269	0.625989
		PF08_0107	1.64956	0.114682	0.776045	0.20544	3.14811	0.310364
		PFD0615c	1.31183	0.208063	1.06213	2.04282	12.4525	0.533406
		PFD0625c	2.17926	0.408595	139.096	47.1644	8.34832	0.531302
		PFD0630c	0.219704	0.0301444	0.162115	0.072338	0.130355	0.139191
		PFD0995c	1.0132	0.163524	0.588282	0.393519	5.66659	0.165587
		PFD1015c	1.46825	0.0935961	0.243007	0.309606	3.13412	0.752239
		PFL1960w	0.753677	0.220543	58.039	12.8472	4.73382	1.01105
	UpsD	PFE1640w	0.296849	0.237971	0.0897713	0.0347222	0.270038	1.1352
	UpsE	Average PFL0030c	0.601164	176.613	131.314	68.6728	1.49904	1011.23
		PFL0030c	0.590144	135.768	113.447	65.3935	1.34086	843.77
		PFL0030c 3	0.271253	169.118	118.38	55.2662	0.937437	816.416
		PFL0030c 4	0.569169	139.426	115.42	56.5683	1.36418	894.27
		PFL0030c 2	0.750122	185.041	159.155	78.9931	1.45746	1042.61
		PFL0030c 5	0.494867	151.475	113.776	63.9468	1.64634	977.385
		PFL0030c 6	0.931431	278.852	167.705	91.8692	2.24798	1492.91
